# Supplementary material for: Lyophilized Gelatin@non-Woven Scaffold to Promote Spheroids Formation and Enrich Cancer Stem Cell Incidence
Source: MDPI journal article supplement (doi:10.3390/nano12050808), 2022-02-28
Supplement: s1 [file s1]

# Supplementary information

## Lyophilized gelatin@non-woven scaffold to promote spheroids formation and enrich cancer stem cell incidence

Jing-jing Fu <sup>1,2</sup>, Feng Chen <sup>2</sup>, Hui-hui Chai <sup>2</sup>, Li-xia Gao <sup>3</sup>, Xiao-hui Lv <sup>2</sup> and Ling Yu <sup>2,4,\*</sup>

<sup>1</sup> School of Preclinical Medicine, North Sichuan Medical College, Nanchong 637000, China; fujingjing1991@nsmc.edu.cn

<sup>2</sup> Institute for Clean Energy & Advanced Materials, School of Materials & Energy, Southwest University, Chongqing 400715, China; cf19950629@email.swu.edu.cn (F.C.); chh0221@email.swu.edu.cn (H.C.); lvxiaohui@email.swu.edu.cn (X.L.)

<sup>3</sup> National & Local Joint Engineering Research Center of Targeted and Innovative Therapeutics, Chongqing Key Laboratory of Kinase Modulators as Innovative Medicine, College of Pharmacy & International Academy of Targeted Therapeutics and Innovation, Chongqing University of Arts and Sciences, Chongqing 402160, China; LixiaGao@cqwu.edu.cn

<sup>4</sup> Guangan Changming Research Institute for Advanced Industrial Technology, Guangan 638500, China;

\* Correspondence: lingyu12@swu.edu.cn

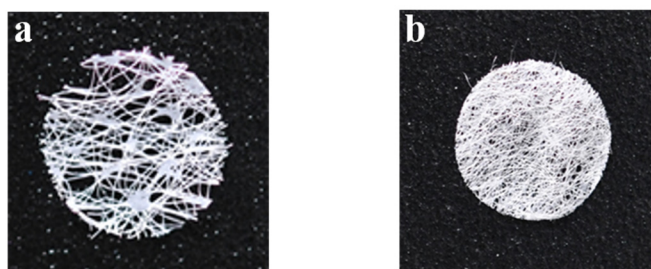

**Figure S1.** Digital-image-characterization of lyophilizing gelatin@non-woven fabric (NWF) scaffold. (a) primary NWF, (b) gelatin@NWF.

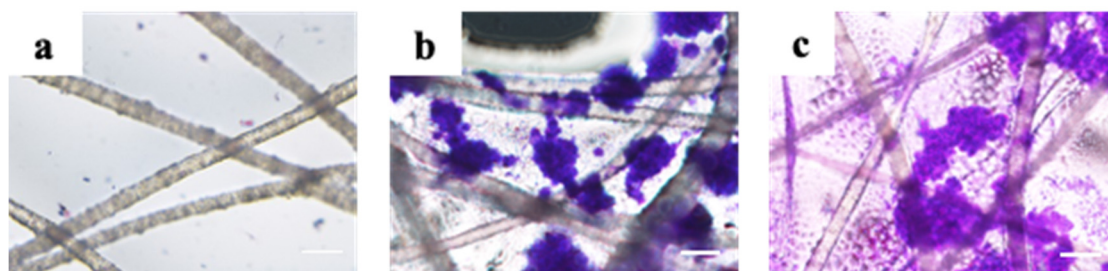

**Figure S2.** Cristal violet stained DU 145 cells which were grown on (a) NWF, (b) 6% gelatin@NWF, and (c) 12% gelatin@NWF, scale bar=50  $\mu$ m.

**Table S1.** Mechanical property of gelatin@NWF

| Material     | TS (MPa)        | EBA%             |
|--------------|-----------------|------------------|
| gelatin film | 0.81 $\pm$ 0.14 | 32.12 $\pm$ 4.51 |
| gelatin@NWF  | 0.98 $\pm$ 0.25 | 46.77 $\pm$ 2.14 |

TS: tensile strength; EBA: elongation at break

**Table S2.** Primers and conditions of qPCR

| Gene    | Primer  | Sequence (5'- 3')         | T <sub>M</sub> (°C) |
|---------|---------|---------------------------|---------------------|
| OCT4    | forward | AACCGAGTGAGAGGCAACCT      | 60.0                |
|         | reverse | ACAGAACCACACTCGGACCA      | 60.0                |
| SOX2    | forward | TGACCAGCTCGCAGACCTAC      | 60.0                |
|         | reverse | TCGGACTTGACCACCGAAC       | 60.0                |
| ALDH1A1 | forward | CACAGGATCAACAGAGGTTGG     | 60.0                |
|         | reverse | GTCCAAGTCGGCATCAGCTA      | 56.0                |
| GAPDH   | forward | CCAGGTGGTCTCCTCTGACTTCAAC | 62.5                |
|         | reverse | AGGGTCTCTCTCTTCCTCTTGCTC  | 62.0                |
